# Supplementary material for: Activation-free fabrication of high-surface-area porous carbon nanosheets from conjugated copolymers
Source: Royal Society of Chemistry journal article supplement (doi:10.1039/c8cc05703f), 2018-01-01
Supplement: c8cc05703f1.pdf [file c8cc05703f1.pdf]

## Supporting Information

### **Activation-free fabrication of high-surface-area porous carbon nanosheets from conjugated copolymers**

Youchen Tang,<sup>‡</sup> Shaohong Liu,<sup>‡</sup> Bingna Zheng, Ruliang Liu, Ruowen Fu, Dingcai Wu,<sup>\*</sup> Mingqiu Zhang<sup>\*</sup> and Minzhi Rong<sup>\*</sup>

*Materials Science Institute, PCFM Lab and GDHPRC Lab, School of Chemistry, Sun Yat-sen University, Guangzhou 510275, P.R. China.*

E-mail: wudc@mail.sysu.edu.cn; ceszmq@mail.sysu.edu.cn; cesrmz@mail.sysu.edu.cn

### **EXPERIMENTAL**

2 mL of GO aqueous solution (C6G6 Technology Co. Ltd.; 10 mg mL<sup>-1</sup>) was first added into 80 mL of deionized water, and then sonicated for 1 h to achieve single layer GO aqueous dispersion. Subsequently, 0.216 mL of predistilled aniline and 0.164 mL of predistilled pyrrole were added with further sonication at room temperature for 1 h, followed by refluxing at 95 °C for 4h, leading to the formation of mrGO. After that, 1 g of ammonium persulfate aqueous solution and 0.1 mL of hydrochloric acid (12 M) were added into the above precooled suspension in sequence. The target product GO@PACP was then collected and washed with a large amount of deionized water after polymerization for 12 h at 0 °C. For the preparation of GO@PANi and GO@PPy samples, only 0.432 mL of aniline or 0.328 mL of pyrrole was added, respectively. GO/PACP was obtained without the modification process at 95 °C. PACP nanoparticles were obtained without the addition of GO.

GO@PACP, GO@PANi, GO@PPy, GO/PACP, and PACP were carbonized at 900 °C in N<sub>2</sub> flow for 15 h with a heating rate of 2 °C min<sup>-1</sup>, leading to the formation

of HSA-PCNs-PACP, PCNs-PANi, PCNs-PPy, PCNs-PACP, and C-PACP, respectively. rGO was also obtained by treating GO under the same conditions.

The nanomorphologies were investigated with a field-emission scanning electron microscopy (FESEM, Hitachi S-4800), a transmission electron microscopy (TEM, Tecnai G2 Spirit), and an atomic force microscopy (AFM, Bruker Dimension edge). Pore structures were conducted on a Micromeritics ASAP 2020 analyser at 77 K. BET area surface and DFT pore size distribution were calculated based on Brunauer-Emmett-Teller theory and original Density Function Theory, respectively. FTIR spectra were provided by the Bruker Equinox 55. X-ray photoelectron spectroscopy (XPS) spectra were measured on a Thermo SCIENTIFIC ESCALAB 250Xi. Thermogravimetric analysis (TGA) was carried out on a TA Instruments Q50 at a heating rate of 10 °C min<sup>-1</sup> under nitrogen flow. X-ray diffraction (XRD) patterns were obtained on a RIGAKU D-MAX 2200 VPC with Cu-K $\alpha$  radiation. Raman spectra were collected on a HORIBA JY with 532 nm lasers. The content of nitrogen in bulk was examined by a vario EL Elemental Analyzer (Elementar Germany).

**Table S1.** Comparison of  $S_{\text{BET}}$  between the HSA-PCNs-PACP sample and other previously reported graphene-templated porous carbon nanosheets.

| Sample               | Precursor                                                                 | $S_{\text{BET}}$<br>( $\text{m}^2 \text{g}^{-1}$ ) | Reference        |
|----------------------|---------------------------------------------------------------------------|----------------------------------------------------|------------------|
| <b>HSA-PCNs-PACP</b> | <b>PACP</b>                                                               | <b>1606</b>                                        | <b>This work</b> |
| GNPCSS-800           | ZIF-8                                                                     | 911                                                | [S1]             |
| GMP-S                | thiophene-containing polymers                                             | 888                                                | [S2]             |
| NMCSs-11.6           | resorcinol/formaldehyde<br>polymers                                       | 791                                                | [S3]             |
| TPC                  | melamine /aromatic dialdehyde<br>polymers                                 | 762                                                | [S4]             |
| NDCN-7               | polydopamine                                                              | 652                                                | [S5]             |
| CMP-2D               | conjugated microporous<br>polymers                                        | 593                                                | [S6]             |
| G-CBP-a              | aniline, 3-aminophenylboronic<br>acid, and m-phenylenediamine<br>polymers | 363                                                | [S7]             |
| N-RG-O               | polyaniline and polypyrrole                                               | 350                                                | [S8]             |
| N-CNs                | polydopamine                                                              | 273                                                | [S9]             |

**Table S2.** Summary of the pore parameters for different samples.

| Sample        | $S_{\text{BET}}$               | $S_{\text{ext}}$               | $S_{\text{mic}}$               | $V_{\text{mic}}$                | $V_{\text{t}}$                  |
|---------------|--------------------------------|--------------------------------|--------------------------------|---------------------------------|---------------------------------|
|               | ( $\text{m}^2 \text{g}^{-1}$ ) | ( $\text{m}^2 \text{g}^{-1}$ ) | ( $\text{m}^2 \text{g}^{-1}$ ) | ( $\text{cm}^3 \text{g}^{-1}$ ) | ( $\text{cm}^3 \text{g}^{-1}$ ) |
| HSA-PCNs-PACP | 1606                           | 422                            | 1184                           | 0.51                            | 1.01                            |
| PCNs-PACP     | 1377                           | 285                            | 1092                           | 0.5                             | 1.04                            |
| PCNs-PANi     | 1021                           | 247                            | 774                            | 0.36                            | 0.88                            |
| PCNs-PPy      | 350                            | 180                            | 170                            | 0.08                            | 1.08                            |
| C-PACP        | 1120                           | 271                            | 849                            | 0.39                            | 0.92                            |
| rGO           | 108                            | 103                            | 5                              | 0.004                           | 0.10                            |

**Note:**  $S_{\text{BET}}$ ,  $S_{\text{ext}}$ ,  $S_{\text{mic}}$ ,  $V_{\text{mic}}$ ,  $V_{\text{t}}$  denote BET surface area, t-plot external surface area, micropore surface area, micropore volume, and total pore volume, respectively.

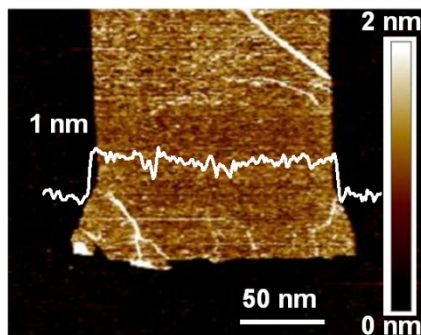

**Fig. S1** AFM image of a GO nanosheet. The average thickness is determined to be 1 nm, suggesting the single layer characteristic of GO nanosheet.<sup>[S10]</sup>

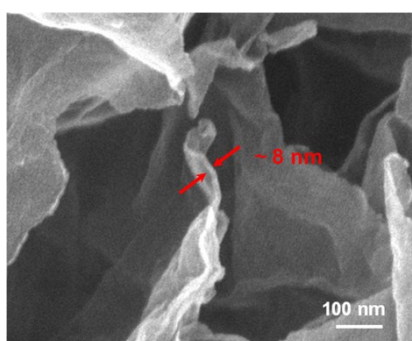

**Fig. S2** SEM image of a GO@PACP nanosheet, showing a thickness of about 8 nm. This means the PACP coating is about 3.5 nm, since the GO thickness is about 1 nm (Fig. S1).

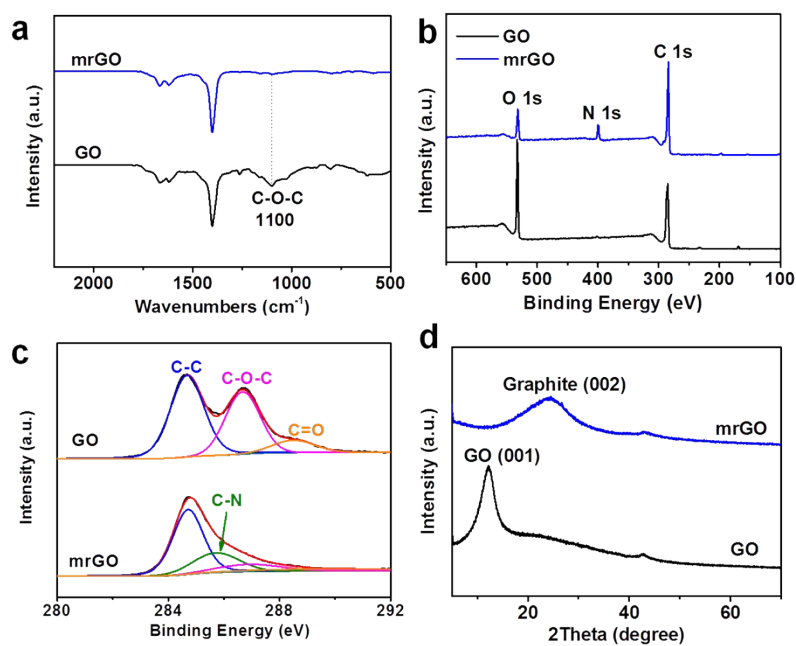

**Fig. S3** (a) FTIR spectra, (b) XPS full scans, (c) high-resolution C 1s spectra, and (d) XRD patterns of GO and mrGO.

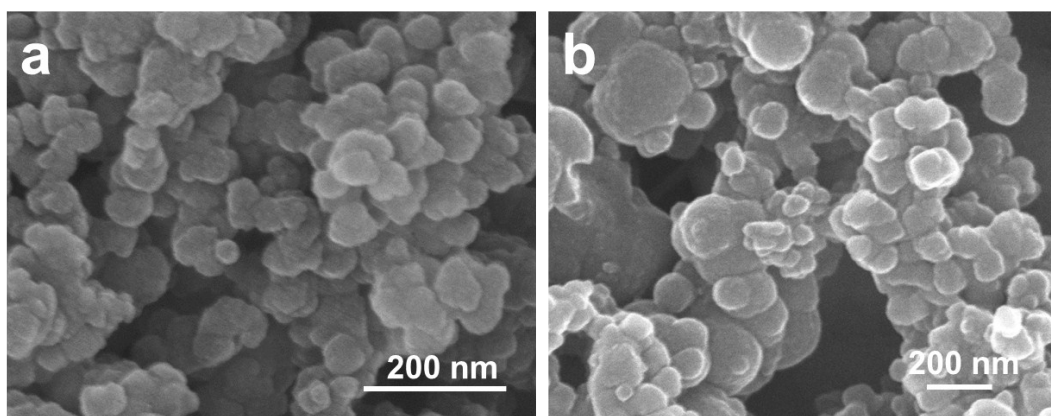

**Fig. S4** SEM images of (a) PACP nanoparticles and (b) their carbonized product C-PACP prepared without GO templates.

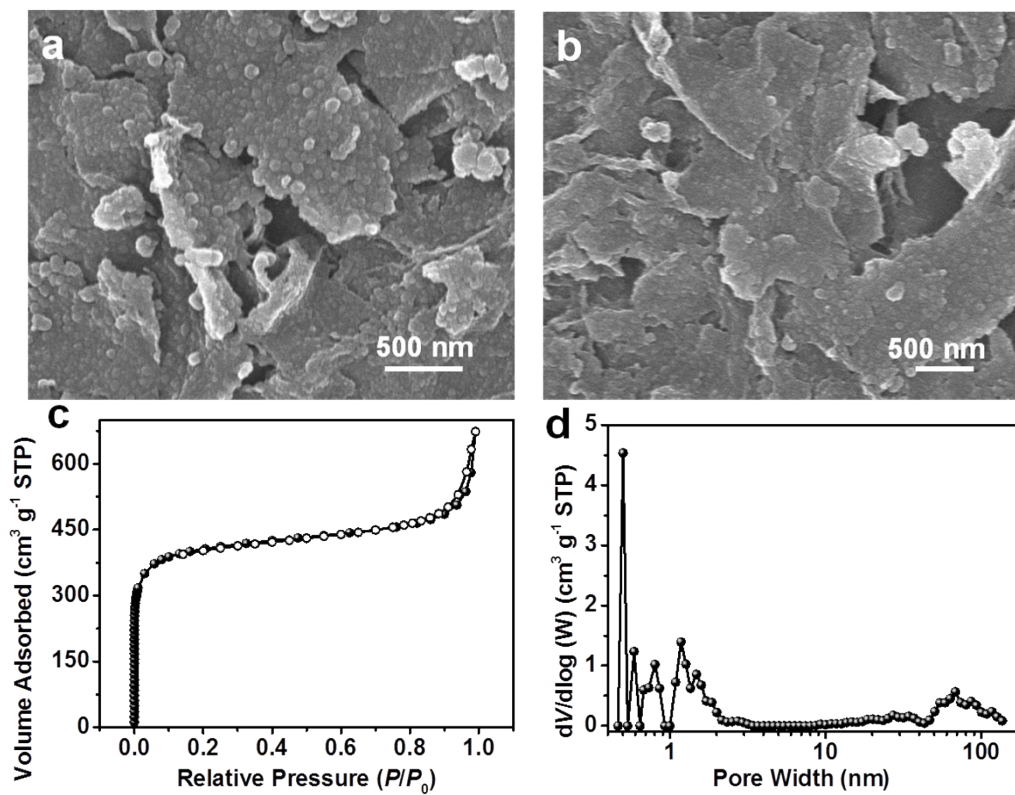

**Fig. S5** SEM images of (a) GO/PACP and (b) its carbonized product PCNs-PACP. (c)  $N_2$  adsorption-desorption isotherm and (d) DFT pore size distribution curve of PCNs-PACP.

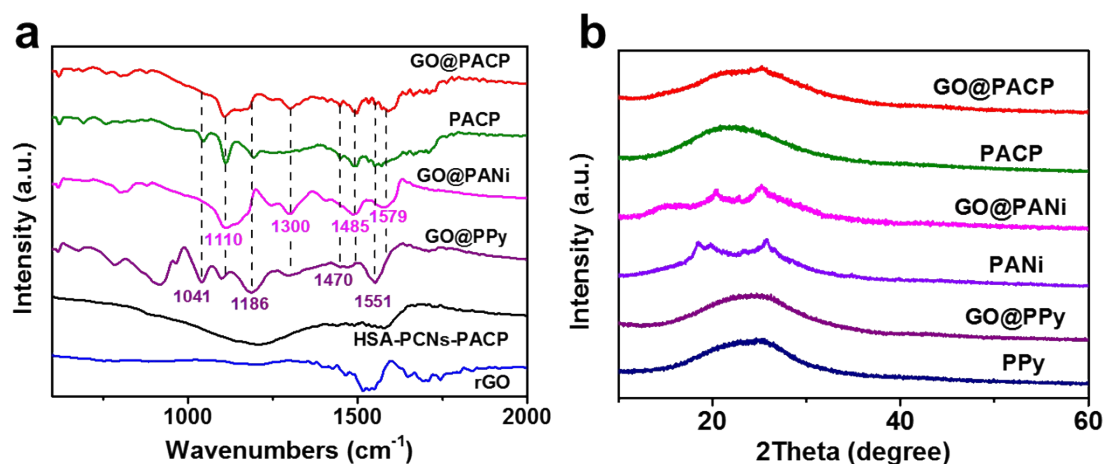

**Fig. S6** (a) FTIR spectra of GO@PACP, PACP, GO@PANi, GO@PPy, HAS-PCNs-PACP and rGO. For GO@PANi, the bands at 1579, 1485, 1300 and 1100 cm<sup>-1</sup> are attributed to the C=C stretch of quinoid and benzenoid rings, the C-N stretch and N=Q=N stretch of quinonoid ring, respectively. For GO@PPy, the bands at 1551 and 1470 cm<sup>-1</sup> are assigned to the stretch of pyrrole ring, the band at 1186 cm<sup>-1</sup> to the C-N stretch, the band at 1041 cm<sup>-1</sup> to the C-H out of plane vibration, and the bands below 900 cm<sup>-1</sup> to the C-H out of plane vibration. For PACP and GO@PACP, the bands at 1579, 1551, 1485, 1470, 1300, 1186, 1100 and 1041 cm<sup>-1</sup> confirm the formation of PACP copolymers. Additionally, the band intensities of polypyrrole at 1551 and 1186 cm<sup>-1</sup> decrease, some bands shift to low wavenumbers and more complicated bands appear in GO@PACP, indicating that PACP is successfully obtained instead of a simple mixture of PANi and PPy.<sup>[S11,S12]</sup> After carbonization, these bands disappear. (b) XRD patterns of GO@PACP, PACP, GO@PANi, PANi, GO@PPy and PPy. A broad band at intermediate positions ( $2\theta = 24^\circ$ ) between those of PANi and PPy implies a low crystalline degree for PACP and thus a shorter conjugation length for PACP chains.

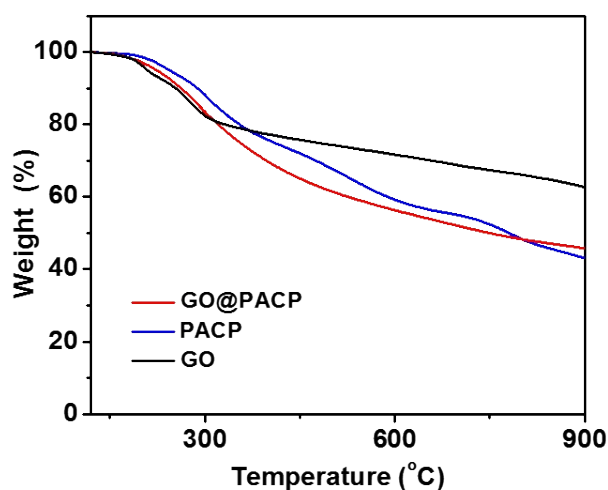

**Fig. S7** TGA curves of GO, PACP and GO@PACP under nitrogen flow at a heating rate of  $10\text{ }^{\circ}\text{C min}^{-1}$ . The remaining weights of GO, PACP and GO@PACP at  $900\text{ }^{\circ}\text{C}$  are 63%, 43% and 46%, respectively.

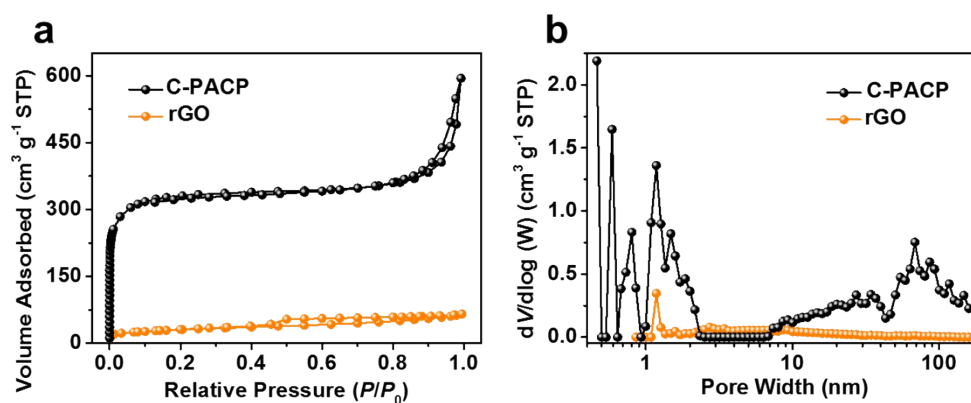

**Fig. S8** (a)  $\text{N}_2$  adsorption–desorption isotherms and (b) DFT pore size distribution curves of C-PACP and rGO.

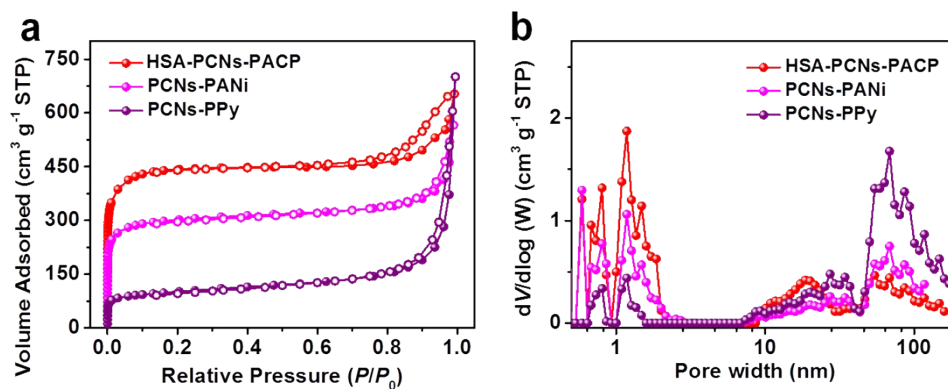

**Fig. S9** (a)  $\text{N}_2$  adsorption–desorption isotherms and (b) DFT pore size distribution curves of HSA-PCNs-PACP, PCNs-PANi and PCNs-PPy.

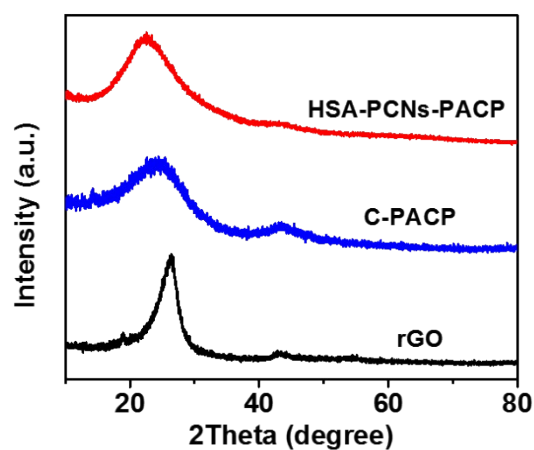

**Fig. S10** XRD patterns of HSA-PCNs-PACP, C-PACP and rGO.

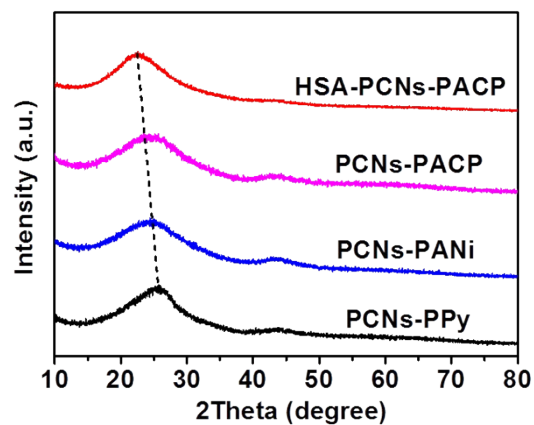

**Fig. S11** XRD patterns of HSA-PCNs-PACP, PCNs-PACP, PCNs-PANi and PCNs-PPy.

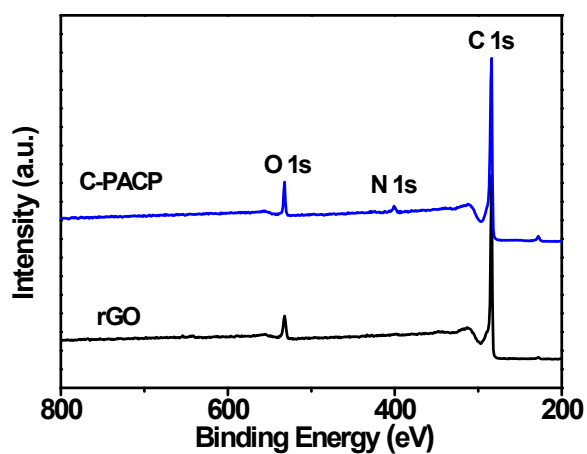

**Fig. S12** XPS spectra of rGO and C-PACP. The content of N element for C-APCP is 3.5 at%, similar to that for HSA-PCNs-PACP.

## References

- S1. H.X. Zhong, J. Wang, Y.W. Zhang, W.L. Xu, W. Xing, D. Xu, Y.F. Zhang, X.B. Zhang, *Angew. Chem. Int. Ed.*, 2014, **53**, 14235-14239.
- S2. X. Zhuang, F. Zhang, D. Wu, N. Forler, H. Liang, M. Wagner, D. Gehrig, M. R. Hansen, F. Laquai and X. Feng, *Angew. Chem. Int. Ed.*, 2013, **52**, 9668-9672.
- S3. Z. Y. Jin, A. H. Lu, Y. Y. Xu, J. T. Zhang and W. C. Li, *Adv. Mater.*, 2014, **26**, 3700-3705.
- S4. X. Zhuang, F. Zhang, D. Wu and X. Feng, *Adv. Mater.*, 2014, **26**, 3081-3086.
- S5. W. Wei, H. Liang, K. Parvez, X. Zhuang, X. Feng and K. Mullen, *Angew. Chem. Int. Ed.*, 2014, **53**, 1570-1574.
- S6. X. Zhuang, D. Gehrig, N. Forler, H. Liang, M. Wagner, M. R. Hansen, F. Laquai, F. Zhang and X. Feng, *Adv. Mater.*, 2015, **27**, 3789-3796.
- S7. Y. Zhang, X. Zhuang, Y. Su, F. Zhang and X. Feng, *J. Mater. Chem.*, 2014, **2**, 7742.
- S8. L. Lai, J. R. Potts, D. Zhan, L. Wang, C. K. Poh, C. Tang, H. Gong, Z. Shen, J. Lin and R. S. Ruoff, *Environ. Sci. Technol.*, 2012, **5**, 7936.
- S9. K. Qu, Y. Zheng, S. Dai and S. Z. Qiao, *Nano Energy*, 2016, **19**, 373-381.
- S10. C. Z. Zhu, S. J. Guo, Y. X. Fang and S. J. Dong, *ACS Nano*, 2010, **4**, 2429-2437.
- S11. V. Lim, E. Kang, K. Neoh, Z. Ma, and K. Tan, *Appl. Surf. Sci.*, 2001, **181**, 317-326.
- S12. B. L. Liang, Z. Y. Qin, T. Li, Z. J. Dou, F. X. Zeng, Y. M. Cai, M. F. Zhu, and Z. Zhou, *Electrochim. Acta*, 2015, **177**, 335-342.
